# Supplementary material for: Cost–Utility Analysis of Glucagon-Like Peptide-1 Agonists Compared with Dipeptidyl Peptidase-4 Inhibitors or Neutral Protamine Hagedorn Basal Insulin as Add-On to Metformin in Type 2 Diabetes in Sweden
Source: PubMed Central journal article supplement — Diabetes Ther. 2014 Sep 12;5(2):591–607. doi: 10.1007/s13300-014-0080-0 (PMC4269657; doi:10.1007/s13300-014-0080-0), 2014-09-12
Supplement: 13300_2014_80_MOESM1_ESM.pdf [file 13300_2014_80_MOESM1_ESM.pdf]

- This study aimed to assess the costs and benefits of three alternative second-line treatment strategies for Swedish patients with type 2 diabetes mellitus (T2DM) who fail to reach glycated haemoglobin (HbA1c)  $\leq 7\%$  with metformin treatment alone: glucagon-like peptide-1 (GLP-1) receptor agonists, dipeptidyl peptidase-4 (DPP-4) inhibitors, and neutral protamine Hagedorn (NPH) insulin.
- Incretin-based therapies (i.e., GLP-1 agonists and DPP-4 inhibitors) are cost-effective options compared to NPH insulin as add-on to metformin.
- At current treatment costs and evidence on treatment efficacy (HbA1c and weight), GLP-1 agonists could be considered cost-effective relative to DPP-4 inhibitors.
- Applying the baseline characteristics from a large sample of T2DM patients from routine practice in Sweden, using utility decrements for a number of complications from a Swedish sample with T2DM, and applying Swedish-specific risk equations for macrovascular events are main strengths of the current study.
- Including only hypoglycemia as a treatment-related adverse event in the model, and not taking into account the possibility of treatment discontinuation by patients due to lack of data are main limitations of the study.

This summary slide represents the opinions of the authors. The first author was funded by the Health Ministry of Iran to conduct this study. For a full list of acknowledgments and conflicts of interest for all authors of this article, please see the full text online. Copyright © The Authors 2014. Creative Commons Attribution Noncommercial License (CC BY-NC).
